# Supplementary material for: Discovery of novel plastid phenylalanine (trnF) pseudogenes defines a distinctive clade in Solanaceae
Source: PubMed Central journal article supplement (PMC3786074; doi:10.1186/2193-1801-2-459), 2013-09-12

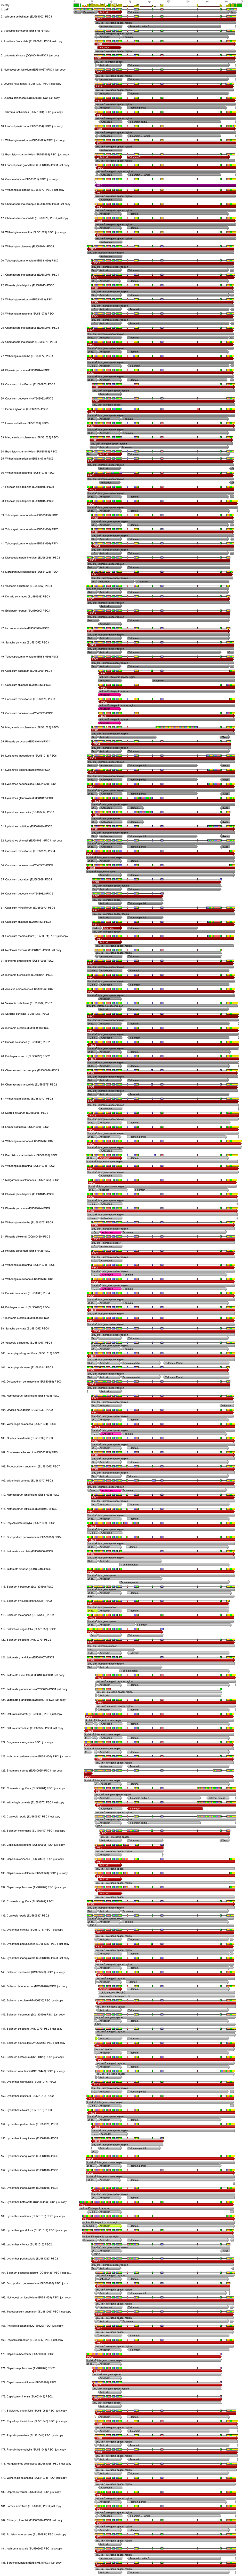

Supplement: 40064_2013_535_MOESM1_ESM.pdf [file 40064_2013_535_MOESM1_ESM.pdf]
